# Supplementary material for: Emergence of Novel QX-Type IBV in China: Molecular Insights into Unique S Protein Cleavage Sites, Antigenic Drift, and Enhanced Pathogenicity (2025)
Source: Research Square preprint supplement (doi:10.21203/rs.3.rs-7926999/v1), 2025-11-13
Supplement: Supplementary file 1 [file 7c36f02188d5168d9e504bf5.docx]

Supplementary material Tables

Table S1. Primers used in this study.

| **Virus** | **Primer** | **Nucleotide information** |
| --- | --- | --- |
| AIV | AIV-M-F | 5'-AGCAAAAGCAGGTAGATGTTGAAAG-3' |
| AIV-M-R | 5'-AGTAGAAACAAGGTAGTTTTTTA-3' |
| NDV | NDV-F | 5'-GACTTTATGAGCACATCATTCTGGA-3' |
| NDV-R | 5'-GGGGTTGCACCAGCTGATAGTTGTG-3' |
| ILTV | ILTV-F | 5'- CATTACATATTTGAACGCCAGC -3' |
| ILTV-R | 5'- CATTTCTTTCTAACCCGTTCG -3' |
| IBV | IBV-1-F | 5'- CATCCGTTGCTTGGGCTACCTAG -3' |
| IBV-1-R | 5'- GCAGACCAACCTTCTGGTTCC -3' |
| IBV | IBV-2-F | 5'- CACAAGTTGTTGTTCGTGGC -3' |
| IBV-2-R | 5'- GAGCGTCCTTATGAACTATAC -3' |
| IBV | IBV-3-F | 5'- GCGGGTGGCAAGACTGTCAC -3' |
| IBV-3-R | 5'- AATGCCTTTGACATAAGAAGG -3' |
| IBV | IBV-4-F | 5'- GGACTATGTTAAGAAACATGG -3' |
| IBV-4-R | 5'- CCATCTCCTACTTTATCGGC -3' |
| IBV | IBV-5-F | 5'- GTTGATGGTGTAACTATGGGC -3' |
| IBV-5-R | 5'- GTACCACTAACGATACCACC -3' |
| IBV | IBV-6-F | 5'- TCAGCGACTGTCAAGTCAGG -3' |
| IBV-6-R | 5'- TACCACCATAAGAGCAAGC -3' |
| IBV | IBV-7-F | 5'- GAAAGCAAATTGTGGTGATAG -3' |
| IBV-7-R | 5'- GAGGGAATGTGTGAAAACTC -3' |
| IBV | IBV-8-F | 5'- GGACAATTTGTTGGGTATGC -3' |
| IBV-8-R | 5'- GTTCATAATTACTAGGAGTGG -3' |
| IBV | IBV-9-F | 5'- CCTGATGTTGTAGAGCGAGCC -3' |
| IBV-9-R | 5'- AAGAATGGACACACCTGCCAC -3' |
| IBV | IBV-10-F | 5'- TTTGAATGTTATGAAGGTGG -3' |
| IBV-10-R | 5'- TAGTCTTACCAGGTTCCCACG -3' |
| IBV | IBV-11-F | 5'- TCATTAAGACGCTTTGCTG -3' |
| IBV-11-R | 5'- ATGACTACAAGTATACCACGC -3' |
| IBV | IBV-12-F | 5'- GTAGACTCTTCACAAGGTTC -3' |
| IBV-12-R | 5'- TAAACATACAGATTCGCTCC -3' |
| IBV | IBV-13-F | 5'- GGCTTCTTATAATGCAGCTG -3' |
|  | IBV-13-R | 5'- AAATTCACAACTGGTGTTGC -3' |
| IBV | IBV-14-F | 5'- CAAGATTGTGCATGGTGGAC -3' |
|  | IBV-14-R | 5'- TATGTTATCACAAACAGGACC -3' |
| IBV | IBV-15-F | 5'- ACACAAACAGCTCAGAGTGG -3' |
|  | IBV-15-R | 5'- CTTGAATTGCATCAAGTTGC -3' |
| IBV | IBV-16-F | 5'- CATTGGTCATATGCAGGAAGG -3' |
|  | IBV-16-R | 5'- GGAGTATTGAACCTACGGCATTA -3' |
| IBV | IBV-17-F | 5'- TGGATACGCAACTAGGAGTCG -3' |
|  | IBV-17-R | 5'- CATCATCAAATTCCAGCTGTGC -3' |
| IBV | IBV-18-F | 5'- CATGGCTACATGCTGACAGCCTA -3' |
|  | IBV-18-R | 5'- TACAAACGTCGTATAGCCGACC -3' |
| IBV | IBV-19-F | 5'- GTAAGACCAAAATCACGCCCAAG -3' |
|  | IBV-19-R | 5'- AAGCAGTGGTATCAACGCAGAGT -3' |

Table S2. The primers for immune-related genes used in this study.

| **Primer** | **F/R** | **Nucleotide sequence (5′- 3′)** | **Accession No.** |
| --- | --- | --- | --- |
| GAPDH | F | CAACACAGTGCTGTCTGGTGGTA | NM_204305 |
|  | R | ATCGTACTCCTGCTTGCTGATCC |  |
| IL-1β | F | CCTGTCTCTGTCCCTACCCCCTA | HQ739080 |
|  | R | GTCAACGGGTGTGCTGCAGGAAC |  |
| IL-2 | F | AACTGGGACACTGCCATGAT | AJ224516.1 |
|  | R | TCCTGGGTCTCAGTTGGTGT |  |
| IL-6 | F | GCATTCACTGAGTTTCCACCATT | AJ309540 |
|  | R | GTAGCACTGAGGGACATGGTAAG |  |
| IL-10 | F | GATTCAGATAGAAGTTCTGTGCC | AJ621254.1 |
|  | R | GGTAACTTCTCTAAACACAGCAG |  |
| IFN-γ | F | ACTGACAAGTCAAAGCCGCACA | FJ537926.1 |
|  | R | TCGTTCATCGGGAGCTTGGC |  |
| TNF-α | F | GGGAATGAACCCTCCGCAGT | AY765397.1 |
|  | R | CCACCACACGACAGCCAAGT |  |
| MAD5 | F | CACGGCACGCTGGTGGATAAC | AB371640.1 |
|  | R | GCAAGGCTTTCATGTTGGGTTTCTC |  |
| TLR7 | F | ACCGTCGCCTCAAGGAAGTCC | KM486601.1 |
|  | R | TGCACCTGAAGTCAATCTCCACAAG |  |

Table S3. IBV reference sequences information.

| **Genotype** | **IBV strains** | **Country/region of origin** | **Collection date** | **Cleavage site** | **Accession numbers** |
| --- | --- | --- | --- | --- | --- |
| GI-1 | H120 | China | Vaccine | RRFRR | FJ888351 (S1) |
| M41 | USA | Vaccine | RRFRR | GQ504725 (S1) |
| Ma5 | USA | 2004 | RRFRR | AY561713 (S1) |
| GI-2 | Holte | USA | 1954 | RRSRR | GU393336 (S1) |
| SDW | China | 2005 | RRIRR | DQ070840 (S1) |
| GI-3 | Gray | USA | 1993 | RRSRR | L14069 (S1) |
| JMK | USA | 1993 | RRSRR | L14070 (S1) |
| GI-4 | GX2-98 | China | 2003 | RRSRR | AY251816 (S1) |
| Holte | USA | 1995 | RRSRR | L18988 (S1) |
| GI-5 | N1/62 | Australia | 1995 | RRSRR | U29522 (S1) |
| V2-02 | Australia | 2006 | RRSRR | DQ490215 (S1) |
| GI-6 | J9 | China | 2006 | RRSRR | DQ515802 (S1) |
| Vic S | Australia | 1995 | RRSRR | U29519 (S1) |
| GI-7 | T07/02 | Taiwan | 2004 | RRFRR | AY606322 (S1) |
| TW2296/95 | Taiwan | 2006 | RRFRR | DQ646404 (S1) |
| TW2575/98 | Taiwan | 2006 | RRFRR | DQ646405 (S1) |
| GI-8 | L165 | USA | 1965 | HRSRR | JQ964061 (S1) |
| SE 17 | USA | 1993 | HRSRR | M99484 (S1) |
| GI-9 | Arkansas | USA | Vaccine | HRSRR | GQ504721 (S1) |
| California 99 | USA | 2003 | HRSRR | AY514485 (S1) |
| GI-10 | K43 | New Zealand | 1999 | SRSRR | AF151958 (S1) |
| T6 | New Zealand | 1999 | SRSRR | AF151960 (S1) |
| GI-11 | IBV/Brasil/351/1984 | Brazil | 1984 | - | GU393339 (S1) |
| UFMG/1141 | Brazil | 2009 | - | JX182783 (S1) |
| GI-12 | D274 | Netherlands | 1989 | RRSRR | X15832 (S1) |
| D3896 | Netherlands | 1990 | RRSRR | X52084 (S1) |
| GI-13 | 4/91 | China | vaccine | RRSRR | KF377577 (S1) |
| ck/CH/LHB/130630 | China | 2013 | RRSRR | KP036504 (S1) |
| UK/7/91 | UK | 1997 | RRSRR | Z83975 (S1) |
| GI-14 | B1648 | UK | 1995 | RRSRR | X87238 (S1) |
| NGA/324/2006 | USA | 2006 | RRSRR | FN182277 (S1) |
| GI-15 | B4 | South Korea | 1986 | RRSRR | FJ807932 (S1) |
| K620/02 | South Korea | 2002 | RRSRR | FJ807944 (S1) |
| GI-16 | IZO 28/86 | Italia | 1986 | RRTGR | KJ941019 (S1) |
| Q1 | Singapore | 2000 | SRTGR | AF286302 (S1) |
| GI-17 | AL/6609/98 | USA | 2002 | HRSRR | AF510656 (S1) |
| CV-56b | USA | 1997 | HRFRR | AF027509 (S1) |
| GI-18 | 53XJ-99II | China | 1999 | RRSRR | KC577391 (S1) |
| JP8127 | Taiwan | 2003 | RRFKR | AY296744 (S1) |
| GI-19 | ck/CH/LDL/091022 | China | 2012 | HRRRR | JX195175 (S1 |
| LX4 | China | 2003 | HRRRR | AY338732 (S1) |
| QXIBV | China | 1999 | HRRRR | AF193423 (S1) |
| QXL87 | China | Vaccine | HRRRR | MH743141 (S1) |
| Sczy3 | China | 2009 | HRRRR | JF732903 (S1) |
| GI-20 | Qu16 | Canada | 2001 | HRSRR | AF349620 (S1) |
| Qu_mv | Canada | 2001 | HRSRR | AF349621 (S1) |
| GI-21 | Italy-02 | Italy | 2002 | HRFRR | AJ457137 (S1) |
| Spain/98/313 | Spain | 2005 | HRSRR | DQ064808 (S1) |
| GI-22 | HN08 | China | 2008 | RRFRR | GQ265940 (S1) |
| SAIBK | China | 2005 | RRFRR | DQ288927 (S1) |
| GI-23 | Ck/EG/CU/4/2014 | USA | 2014 | RRTRR | KY805846 (S1) |
| GI-24 | IBV506 | India | 2013 | RRFRR | KF809796 (S1) |
| V13 | India | 1998 | - | KF757447 (S1) |
| GI-25 | GA/10216 | USA | 2010 | RRSRR | KM660636 (S1) |
| GA/12274 | USA | 2012 | - | KP085595 (S1) |
| GI-26 | NGA/BP61/2007 | USA | 2007 | RRSRR | FN182268 (S1) |
| NGA/N545/2006 | USA | 2006 | HRSRR | FN182270 (S1) |
| GI-27 | GA/12341/2012 | USA | 2012 | RRFRR | KM660634 (S1) |
| Georgia 08 | USA | 2008 | RRSRR | GU301925 (S1) |
| GI-28 | ck/CH/LGX/111119 | China | 2011 | RRFRR | KX640829 (S1) |
| GX-NN-13 | China | 2011 | RRLRR | JX291989 (S1) |
| LDT3 | China | 2004 | RRFRR | AY702975 (S1) |
| LDT3-A | China | 2015 | RRFRR | KR608272 (S1) |
| GI-29 | 66GD-98VI | China | 1998 | RRHRR | KC577397 (S1) |
| I0118/14 | China | 2014 | RRHRR | KY407558 (S1) |
| GII-1 | D1466 | Netherlands | 1989 | RRHRR | M21971 (S1) |
| V1397 | Netherlands | 1989 | RRHRR | M21968 (S1) |
| GIII-1 | N1/88 | Australia | 1995 | HTRRR | U29450 (S1) |
| V18/91 | Australia | 1995 | HTRRR | U29521 (S1) |
| GIV-1 | AR/6386/97 | USA | 1997 | RRIRR | AF274436 (S1) |
| DE/072/92 | USA | 1992 | RRIRR | U77298 (S1) |
| GV-1 | N4/02 | Australia | 2005 | HRKKR | DQ059618 (S1) |
| N5/03 | Australia | 2005 | HRKKR | DQ059619 (S1) |
| GVI-1 | GX-NN09032 | China | 2009 | HRRKR | JX292013 (S1) |
| SDIB781/2012 | China | 2012 | HRRKR | KF007209 (S1) |
| TC07-2 | China | 2007 | HRRKR | GQ265948 (S1) |
| GVII-1 | GX-NN130021 | China | 2013 | HRSKR | KM365468 (S1) |
| I0636/16 | China | 2016 | HRGKR | MH924835 (S1) |
|  | H120 | China | Vaccine | RRFRR | FJ888351 (complete genome) |
|  | M41 | USA | Vaccine | RRFRR | GQ504725 (complete genome) |
|  | TW2575/98 | Taiwan | 2006 | RRFRR | DQ646405 (complete genome) |
|  | 4/91 | China | vaccine | RRSRR | KF377577 (complete genome) |
|  | LX4 | China | 2003 | HRRRR | AY338732 (complete genome) |
|  | Sczy3 | China | 2009 | HRRRR | JF732903 (complete genome) |
|  | SAIBK | China | 2005 | RRFRR | DQ288927 (complete genome) |

Table S4. Detection of gene conversion events in isolated strains

| **Recombinant** | **Major Parent** | **Minor**  **Parent** | | **Breakpoints(nt)** | | **Detection methods**  **(*p* value)** | |
| --- | --- | --- | --- | --- | --- | --- | --- |
| **Beginning** | **Ending** |
| JS/773 | QXL87 MH743141 | 4/91 KF377577 | 8778 | | 12384 | | RDP (1.715×10-73); GENECONV (3.022×10-62); BootScan (1.494×10-73); MaxChi (9.494×10-22); Chimaera (7.470×10-23); SiScan (2.493×10-23); 3Seq (3.552×10-15); |
| JS/774 | QXL87 MH743141 | H120 FJ888351 | | 18805 | 19803 | | RDP (4.022×10-95); GENECONV (3.058×10-99)；BootScan (1.760×10-95); MaxChi (6.901×10-24); Chimaera (2.050×10-24); SiScan (1.126×10-27); 3Seq (3.996×10-15); |
| SD/783 | QXL87 MH743141 | 4/91 KF377577 | | 23865 | End | RDP (3.503×10-202); GENECONV (1.831×10-190)；BootScan (8.947×10-198); MaxChi (4.406×10-44); Chimaera (2.155×10-44); SiScan (2.008×10-58); 3Seq (3.552×10-15); | |
